# Supplementary material for: Carbon encapsulated hybrid Fe-based nanostructure with durable lithium storage
Source: Royal Society of Chemistry journal article supplement (doi:10.1039/d2ce00297c), 2023-01-01
Supplement: d2ce00297c1.pdf [file d2ce00297c1.pdf]

*Electronic Supplementary Information for*

**Carbon encapsulated hybrid Fe-based nanorods with durable lithium storage**

Xiaoyun Chen<sup>a</sup>, Xiaomeng Shi<sup>a</sup>, Mingren Cheng<sup>a</sup>, Mengzhen Zhang<sup>a</sup>, Jiamin Ma<sup>a</sup>, Zhong Liang<sup>a</sup>, Xinyun Zhai<sup>a</sup> and Yaping Du<sup>\*a</sup>

<sup>a</sup>Tianjin Key Lab for Rare Earth Materials and Applications, Center for Rare Earth and Inorganic Functional Materials, School of Materials Science and Engineering & National Institute for Advanced Materials, Nankai University, Tianjin 300350, China.

E-mail: ypdu@nankai.edu.cn

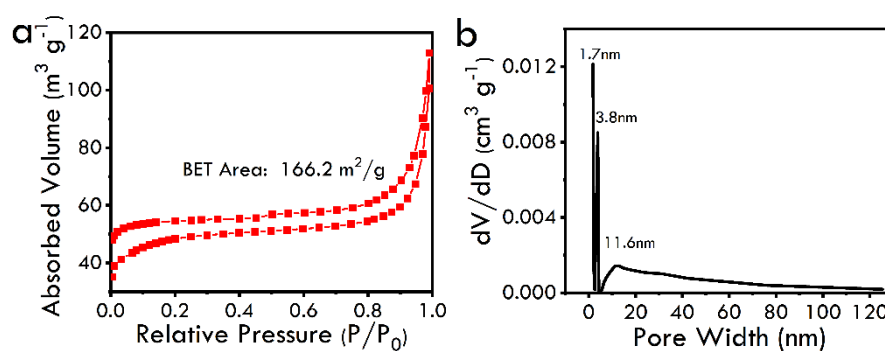

**Fig. S1** (a) Nitrogen adsorption and desorption isotherms of Fe<sub>3</sub>O<sub>4</sub>@NC. (b) The corresponding pore-size distributions calculated through BJH method from adsorption branch.

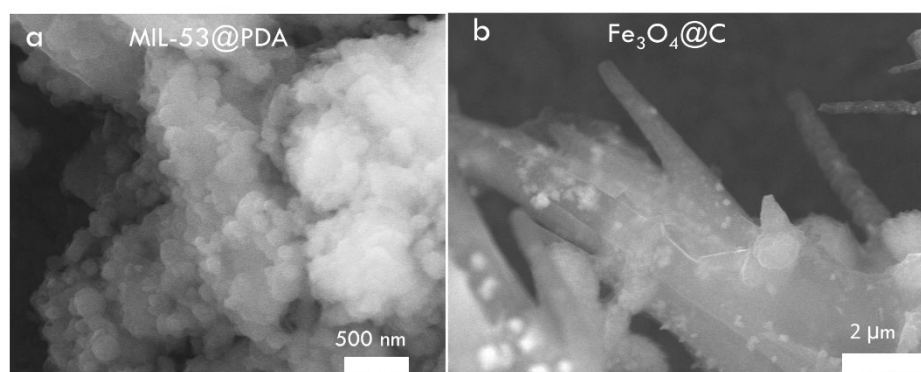

**Fig. S2** The SEM images of MIL-53@PDA (a), Fe<sub>3</sub>O<sub>4</sub>@C (b).

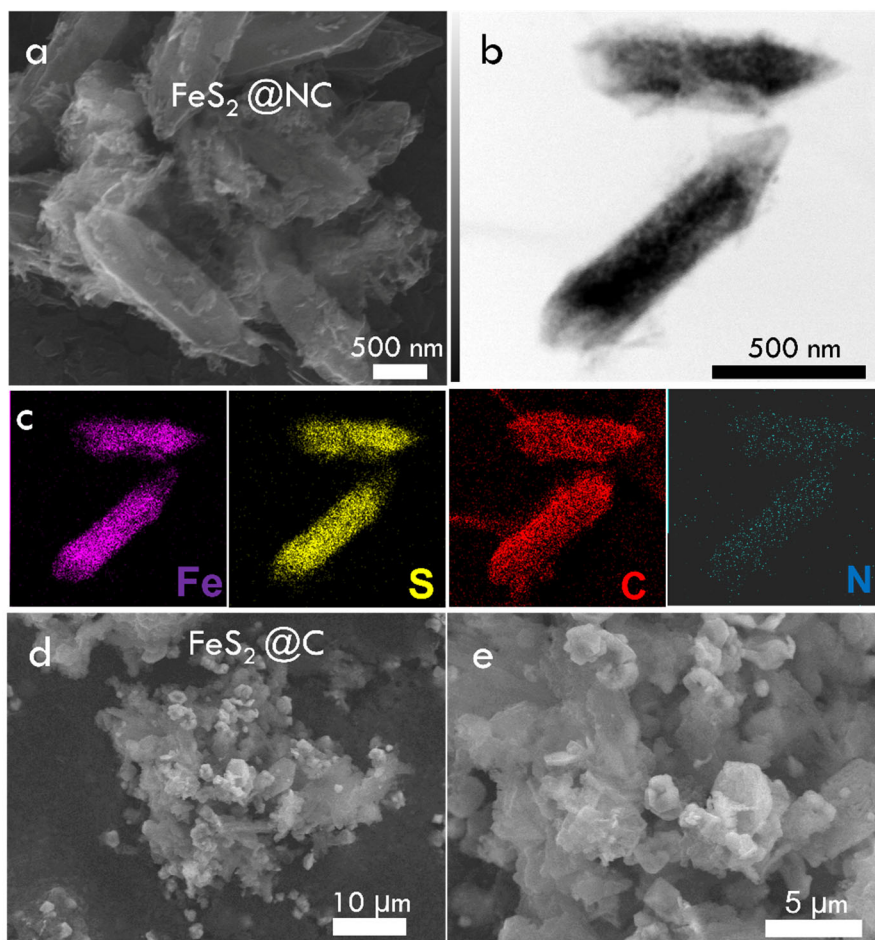

**Fig. S3** (a, b) SEM and TEM images of FeS<sub>2</sub>@NC, (c) Mapping of the FeS<sub>2</sub>@NC, (d, e) SEM images of FeS<sub>2</sub>@C.

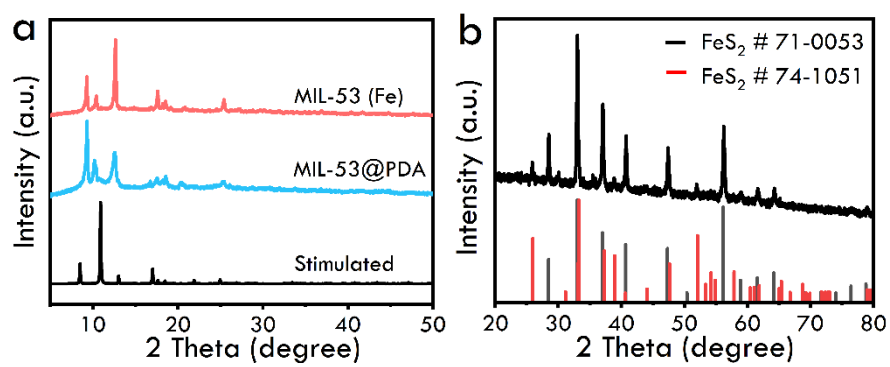

**Fig. S4** XRD patterns of MIL-53 (Fe) (a), FeS<sub>2</sub>@NC (b).

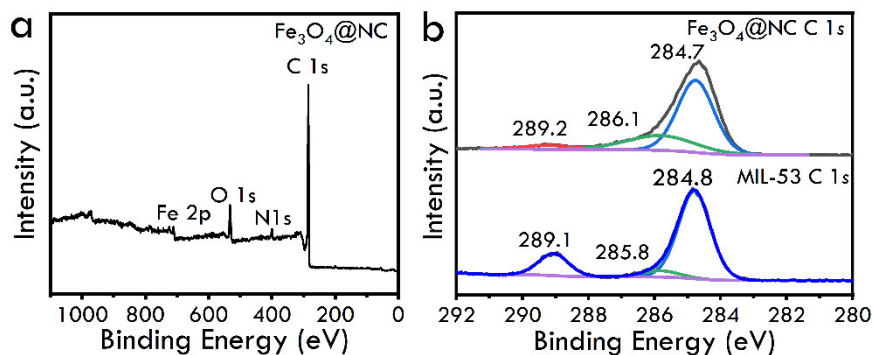

Fig. S5 XPS spectra of  $\text{Fe}_3\text{O}_4@\text{NC}$  (a), C 1s (b) of the  $\text{Fe}_3\text{O}_4@\text{NC}$  and MIL-53 (Fe).

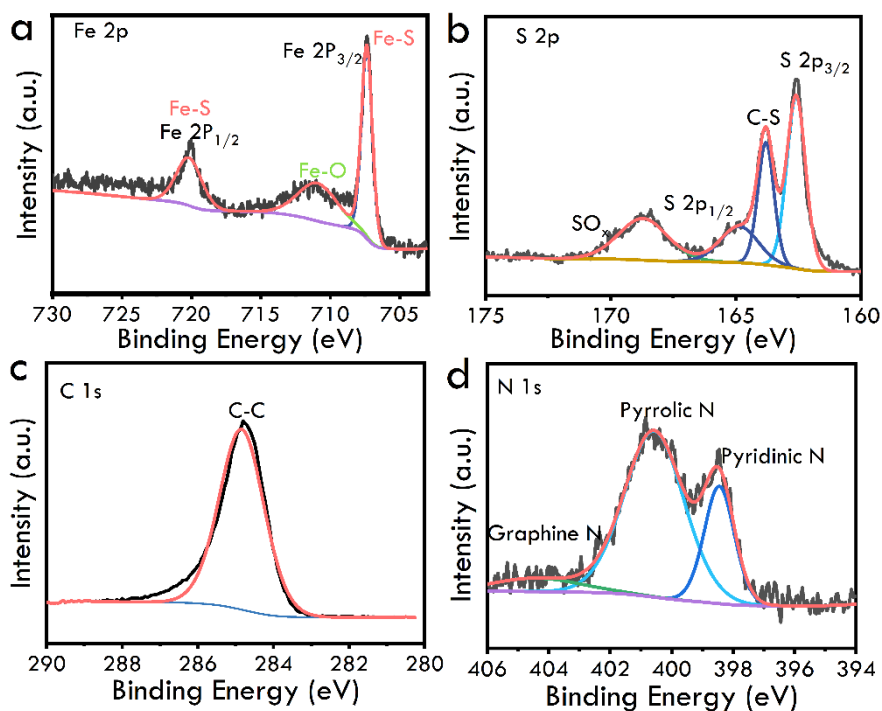

Fig. S6 XPS spectra of  $\text{FeS}_2@\text{NC}$ .

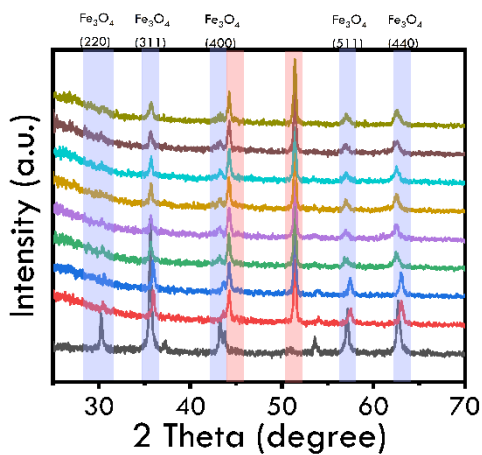

Fig. S7 In situ XRD of  $\text{Fe}_3\text{O}_4@\text{NC}$  during the initial lithiation. The red constant peaks are the shell of

the coin battery. The black line is the electrode and the red line is the XRD of the unrun battery.

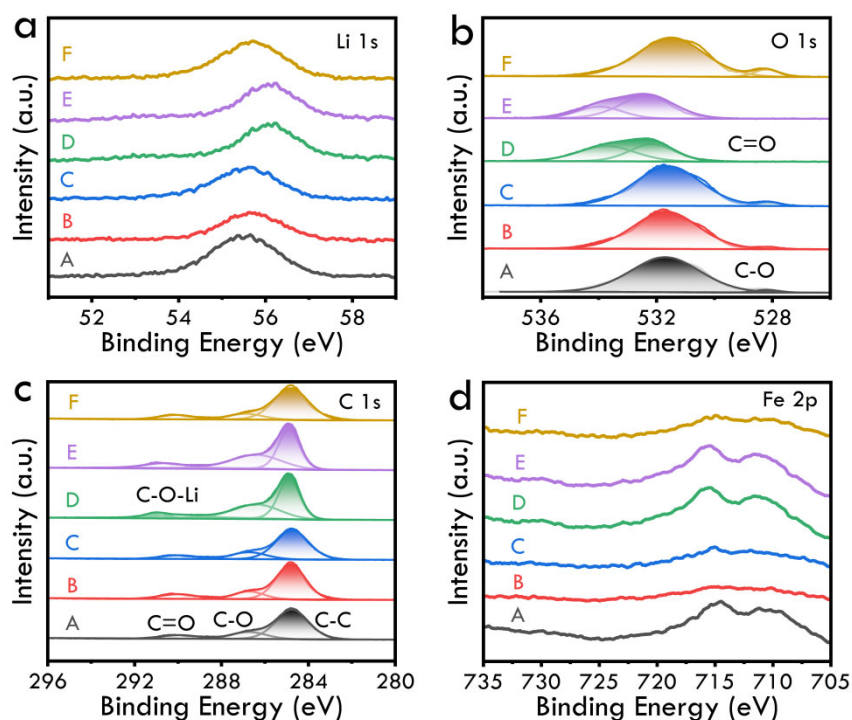

**Fig. S8** XPS spectra of Li 1s (a), O 1s (b), C 1s (c) and Fe 2p (d) of  $\text{Fe}_3\text{O}_4@\text{NC}$ . (A: the initial of the 1nd cycling; B: discharged to 1.02 V; C: discharged to 0.86 V; D: charged to 1.63 V; E: charged to 1.89 V; F: charged to 3 V)

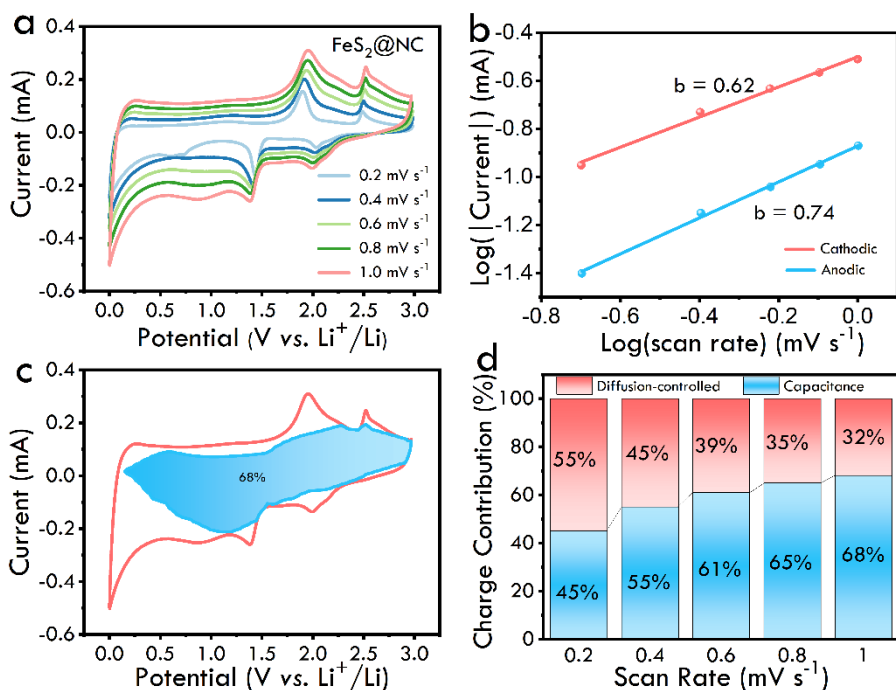

**Fig. S9** (a) CV curves of  $\text{FeS}_2@\text{NC}$  electrode at different scanning speed. (b) Oxidation and reduction current peak diagrams with sweep rate of  $0.2\text{--}1 \text{ mV s}^{-1}$ . (c) CV curve of capacitance current (middle blue part) and total current at  $1 \text{ mV s}^{-1}$  scanning speed. (d) Dependence of capacitance contribution of different scan rates.

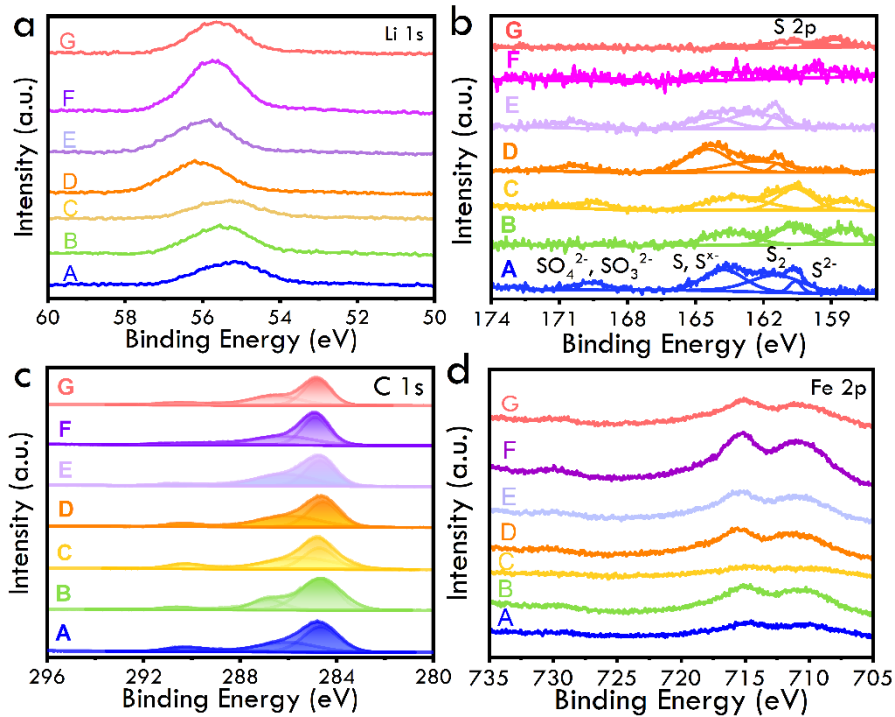

**Fig. S10** ex situ XPS spectra of Li 1s (a), S 2p (b), C 1s (c) and Fe 2p (d). (A: the initial of the 1nd cycling; B: discharged to 2.12 V; C: discharged to 1.52 V; D: charged to 0.95 V; E: charged to 1.84 V; F: charged to 2.43 V; G: charged to 3 V)

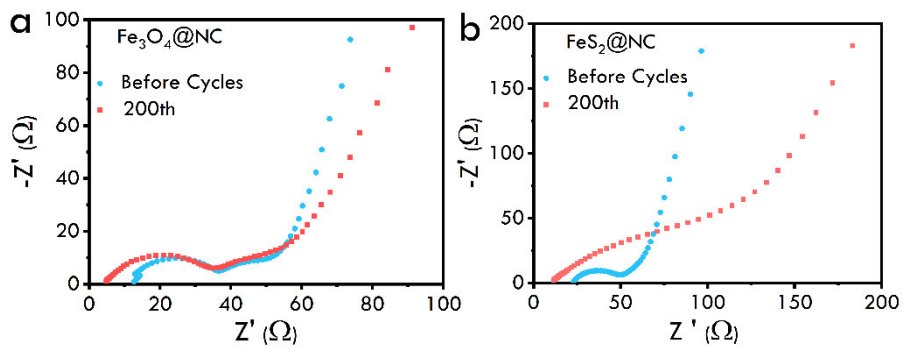

**Fig. S11** EIS analysis of  $\text{Fe}_3\text{O}_4@NC$  (a) and  $\text{FeS}_2@NC$  (b) before and after 200th cycles.
